# Supplementary material for: Discovery of New Inhibitors of Transforming Growth Factor-Beta Type 1 Receptor by Utilizing Docking and Structure-Activity Relationship Analysis
Source: PubMed Central journal article supplement (PMC6747504; doi:10.3390/ijms20174090), 2019-08-21
Supplement: ijms-20-04090-s001.pdf [file ijms-20-04090-s001.pdf]

Supplementary

**Table S1.** The structure and activity of compound 1–47. NO., number of compounds; MS, molecular structure; pIC<sub>50</sub>, -logIC<sub>50</sub>; IC<sub>50</sub>, half maximal inhibitory concentration, nM.

| NO. | MS                                                                                  | pIC <sub>50</sub> | IC <sub>50</sub> *<br>(nM) | NO. | MS                                                                                   | pIC <sub>50</sub> | IC <sub>50</sub> (<br>nM) |
|-----|-------------------------------------------------------------------------------------|-------------------|----------------------------|-----|--------------------------------------------------------------------------------------|-------------------|---------------------------|
| 1   | 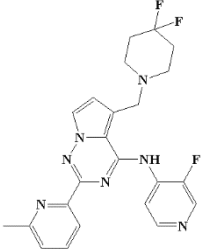   | 0.6021            | 0.25                       | 25  |    | 0.1024            | 0.79                      |
| 2   |    | -0.6021           | 4.00                       | 26  |   | 0.0757            | 0.84                      |
| 3   |  | -2.8195           | 660.00                     | 27  |  | 0.0362            | 0.92                      |
| 4   |  | -2.9494           | 890.00                     | 28  |  | -0.0414           | 1.10                      |
| 5   |  | -2.5563           | 360.00                     | 29  |  | -0.0414           | 1.10                      |

|    |                                                                                     |         |        |    |                                                                                      |         |      |
|----|-------------------------------------------------------------------------------------|---------|--------|----|--------------------------------------------------------------------------------------|---------|------|
| 6  | 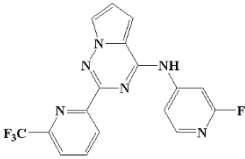   | -2.3979 | 250.00 | 30 |    | -0.0414 | 1.10 |
| 7  |    | -1.1461 | 14.00  | 31 |    | -0.2041 | 1.60 |
| 8  |    | 0.4089  | 0.39   | 32 |    | -0.3424 | 2.20 |
| 9  |  | 0.1024  | 0.79   | 33 |  | -0.5051 | 3.20 |
| 10 |  | -0.3979 | 2.50   | 34 |  | -0.7853 | 6.10 |
| 11 |  | -0.2041 | 1.60   | 35 |  | -0.9138 | 8.20 |
| 12 |  | -0.1761 | 1.50   | 36 |  | -0.9542 | 9.00 |

|    |  |         |       |    |  |         |       |
|----|--|---------|-------|----|--|---------|-------|
| 13 |  | -0.1761 | 1.50  | 37 |  | -1.0000 | 10.00 |
| 14 |  | 0.0315  | 0.93  | 38 |  | -1.0414 | 11.00 |
| 15 |  | -0.5911 | 3.90  | 39 |  | -1.1139 | 13.00 |
| 16 |  | -1.6435 | 44.00 | 40 |  | -1.1761 | 15.00 |
| 17 |  | -1.6232 | 42.00 | 41 |  | -1.4472 | 28.00 |
| 18 |  | -0.5682 | 3.70  | 42 |  | -1.5185 | 33.00 |
| 19 |  | -1.8451 | 70.00 | 43 |  | -1.7482 | 56.00 |

|    |  |         |         |           |  |         |        |
|----|--|---------|---------|-----------|--|---------|--------|
| 20 |  | -1.8129 | 65.00   | 44        |  | -1.8388 | 69.00  |
| 21 |  | -2.1761 | 150.00  | 45        |  | -1.9445 | 88.00  |
| 22 |  | -3.2304 | 1700.00 | 46        |  | -2.1139 | 130.00 |
| 23 |  | -0.6021 | 4.00    | 47        |  | -2.7243 | 530.00 |
| 24 |  | 0.3372  | 0.46    | BMS<br>22 |  | 0.2596  | 0.55   |

The IC<sub>50</sub> values of compound 1-47 are derived from the China patent 201680055202.3. In order to analyze the structure-activity relationship (SAR), the IC<sub>50</sub> values of the compounds were converted into pIC<sub>50</sub> (-logIC<sub>50</sub>).
